# Supplementary material for: Characterization of the Breast Cancer Liver Metastasis Microenvironment via Machine Learning Analysis of the Primary Tumor Microenvironment
Source: PubMed Central journal article supplement (PMC11525956; doi:10.1158/2767-9764.crc-24-0263), 2024-10-31
Supplement: crc-24-0263_supplementary_figure_s2_suppsf2.pdf [file crc-24-0263_supplementary_figure_s2_suppsf2.pdf]

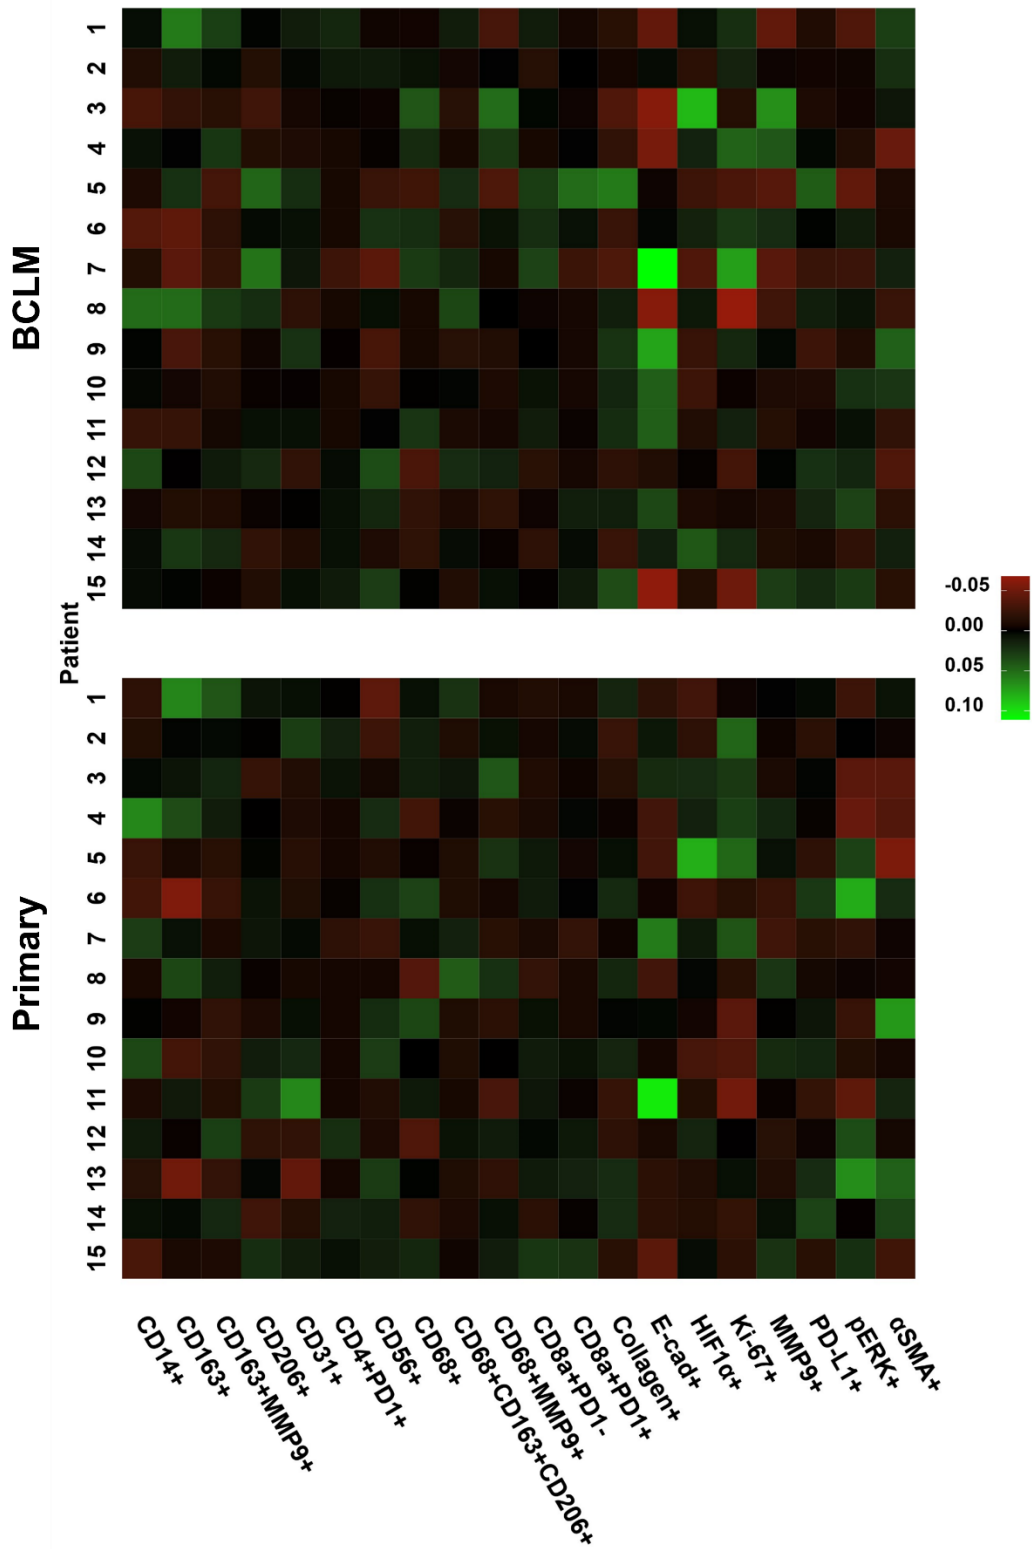

Supplementary Figure 2 – Heatmap of IMC cluster densities originating from BCLM (top) and primary breast tumors (bottom) after mean aggregation of ROIs.
