# Supplementary material for: Characterization of the Breast Cancer Liver Metastasis Microenvironment via Machine Learning Analysis of the Primary Tumor Microenvironment
Source: PubMed Central journal article supplement (PMC11525956; doi:10.1158/2767-9764.crc-24-0263), 2024-10-31
Supplement: crc-24-0263_supplementary_figure_s3_suppsf3.pdf [file crc-24-0263_supplementary_figure_s3_suppsf3.pdf]

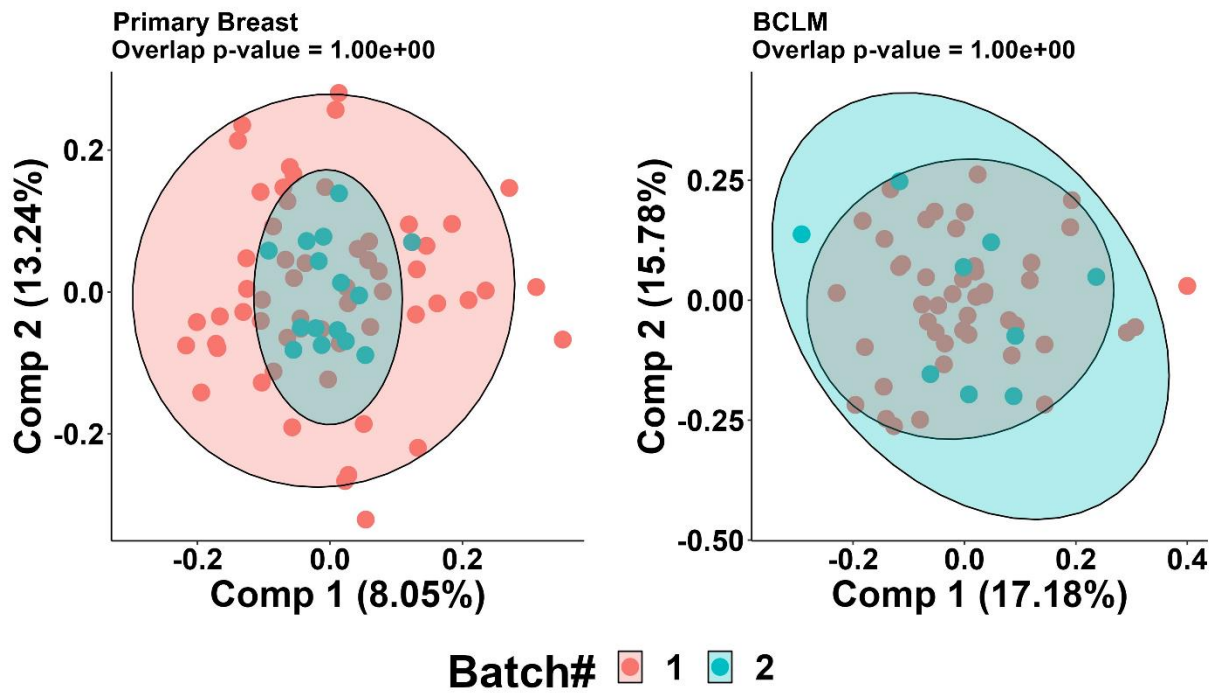

Supplementary Figure 3 – PLS-DA of primary breast and BCLM IMC ROI data by batch number showing that the batches were homogeneous.
