# Supplementary material for: Characterization of the Breast Cancer Liver Metastasis Microenvironment via Machine Learning Analysis of the Primary Tumor Microenvironment
Source: PubMed Central journal article supplement (PMC11525956; doi:10.1158/2767-9764.crc-24-0263), 2024-10-31
Supplement: crc-24-0263_supplementary_figure_s5_suppsf5.pdf [file crc-24-0263_supplementary_figure_s5_suppsf5.pdf]

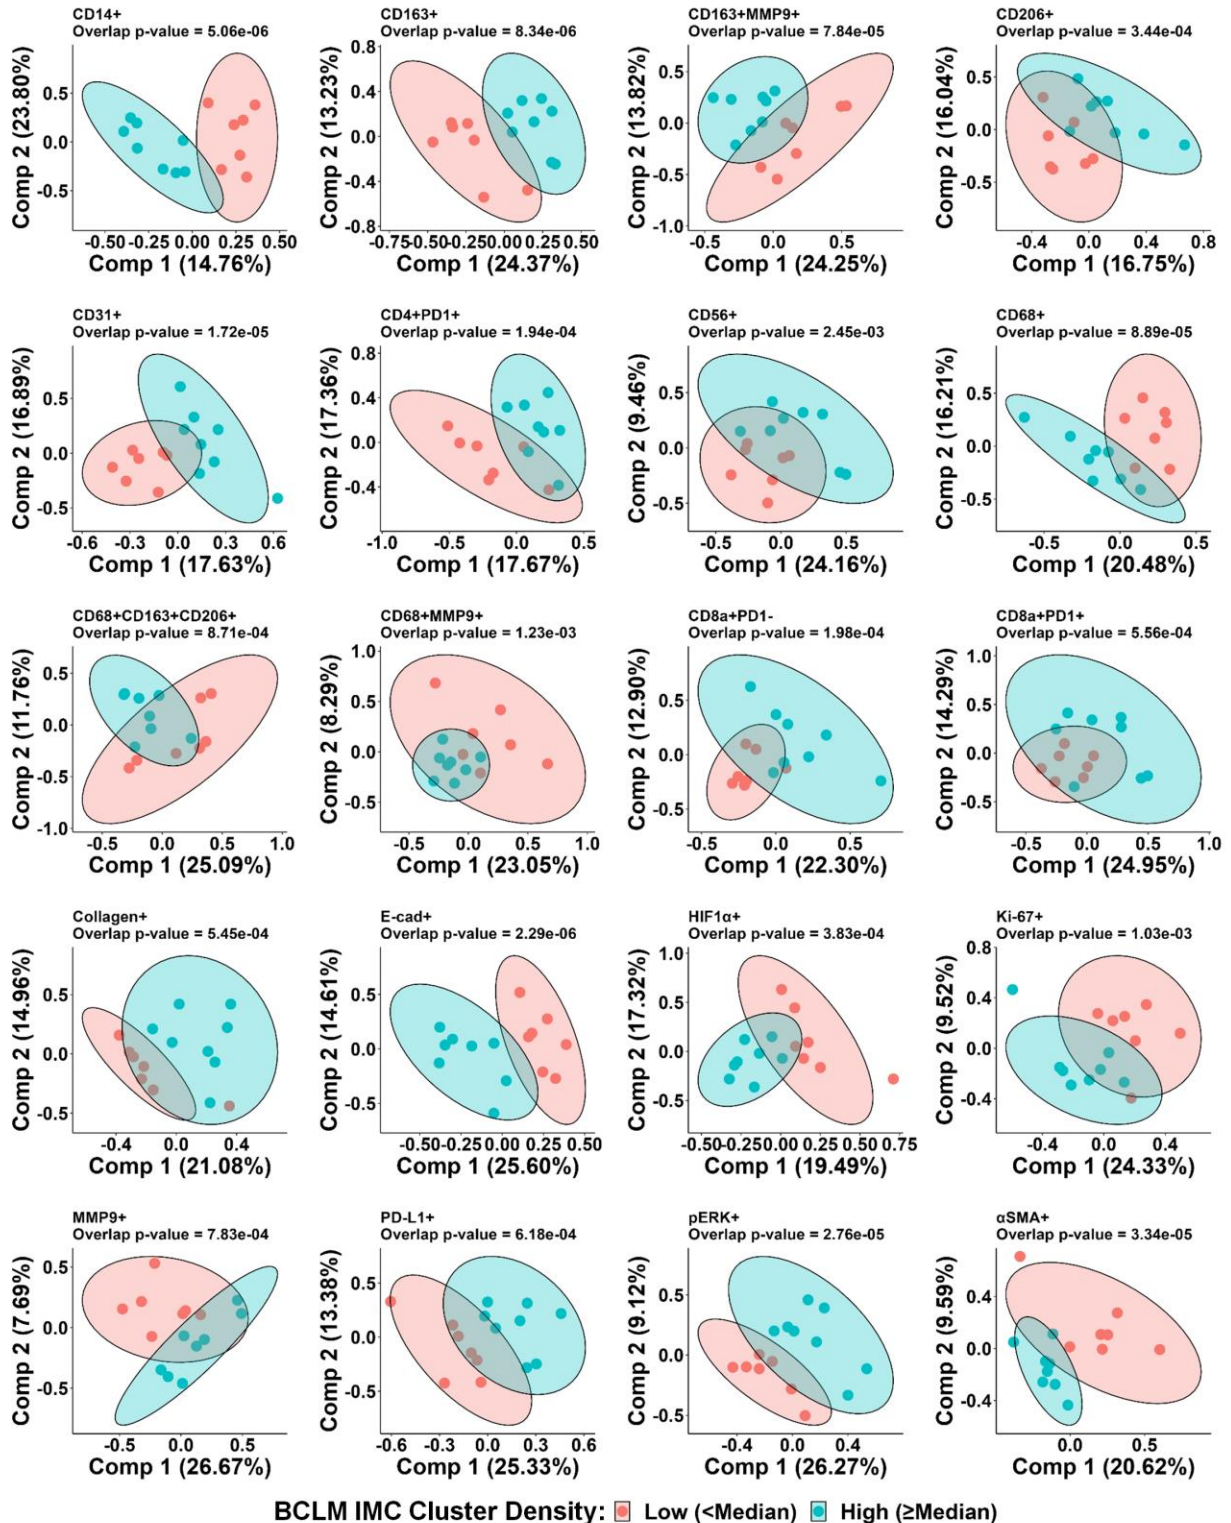

Supplementary Figure 5 – PLS-DA score plots of classifying BCLM IMC cluster densities into Low (<median) or High (≥median) groups using primary tumor IMC cluster densities.
