# Supplementary material for: Characterization of the Breast Cancer Liver Metastasis Microenvironment via Machine Learning Analysis of the Primary Tumor Microenvironment
Source: PubMed Central journal article supplement (PMC11525956; doi:10.1158/2767-9764.crc-24-0263), 2024-10-31
Supplement: crc-24-0263_supplementary_figure_s11_suppsf11.pdf [file crc-24-0263_supplementary_figure_s11_suppsf11.pdf]

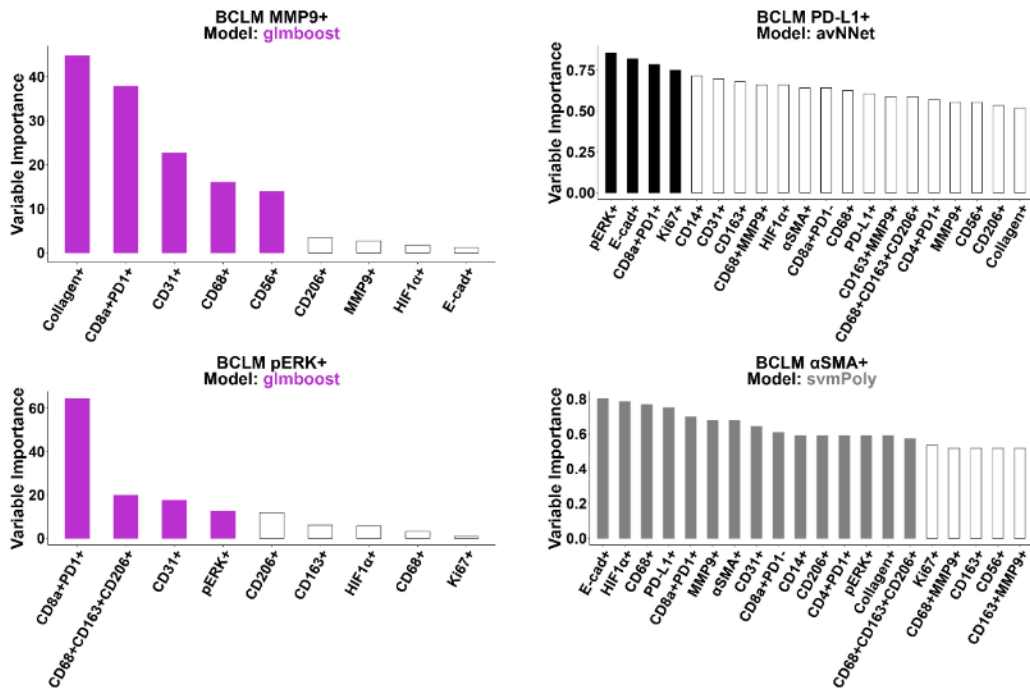

Supplementary Figure 11 – Variable importance for prediction of BCLM MMP9+, PD-L1+, pERK+, and αSMA+ using ML models. IMC clusters given zero variable importance by *varImp* are not shown. Dark bars denote clusters used by the optimized model.
