# Supplementary material for: Characterization of the Breast Cancer Liver Metastasis Microenvironment via Machine Learning Analysis of the Primary Tumor Microenvironment
Source: PubMed Central journal article supplement (PMC11525956; doi:10.1158/2767-9764.crc-24-0263), 2024-10-31
Supplement: crc-24-0263_supplementary_figure_s12_suppsf12.pdf [file crc-24-0263_supplementary_figure_s12_suppsf12.pdf]

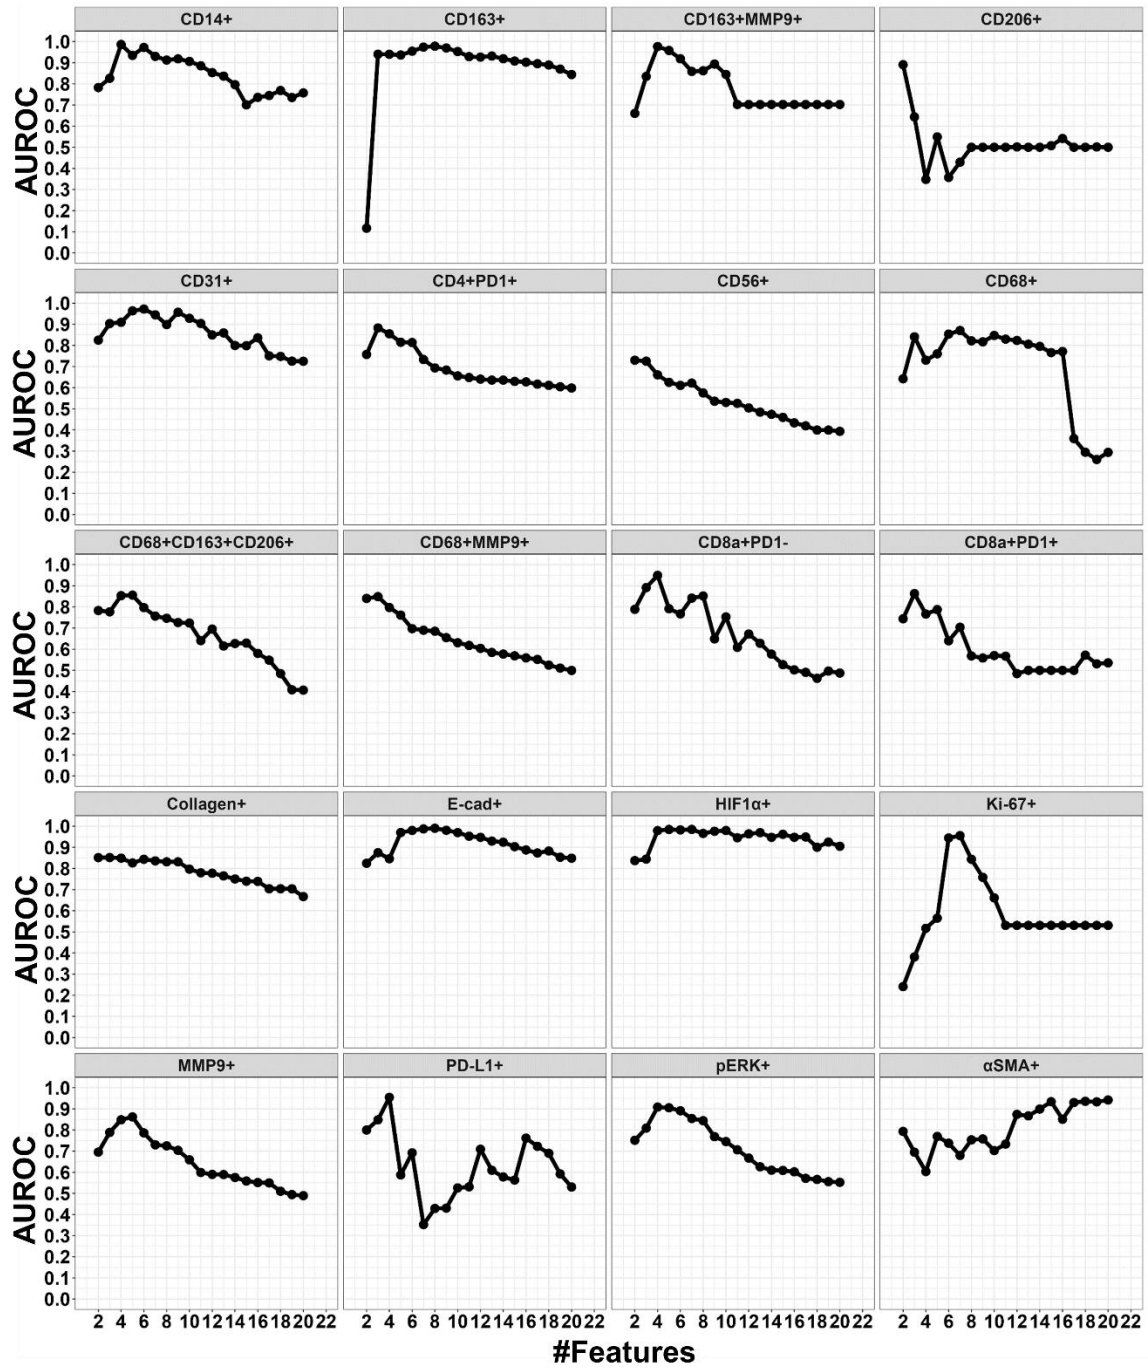

Supplementary Figure 12 – AUROC achieved by ML models using primary tumor IMC clusters across a variable number of features to predict BCLM IMC cluster densities (as stated in gray box of each panel).
