# Supplementary material for: Characterization of the Breast Cancer Liver Metastasis Microenvironment via Machine Learning Analysis of the Primary Tumor Microenvironment
Source: PubMed Central journal article supplement (PMC11525956; doi:10.1158/2767-9764.crc-24-0263), 2024-10-31
Supplement: crc-24-0263_supplementary_figure_s14_suppsf14.pdf [file crc-24-0263_supplementary_figure_s14_suppsf14.pdf]

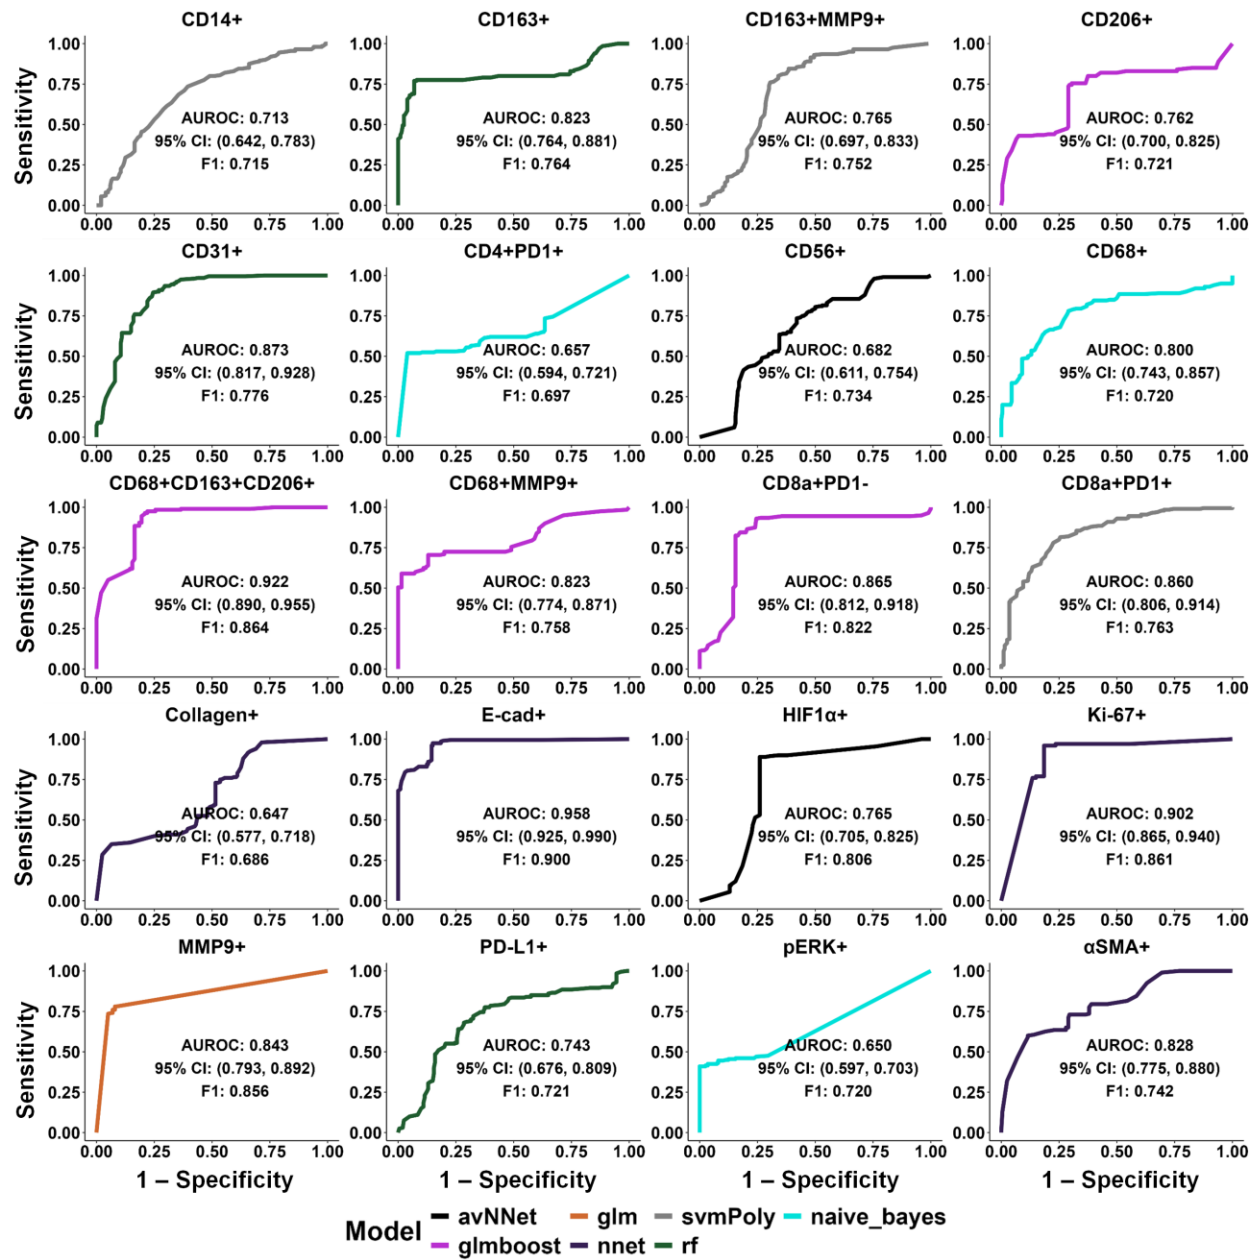

Supplementary Figure 14 – AUROC curves of ML models using covariates only to predict BCLM IMC cluster densities as being either above or below median values. One ML model was created per BCLM cluster.
