# Supplementary material for: Characterization of the Breast Cancer Liver Metastasis Microenvironment via Machine Learning Analysis of the Primary Tumor Microenvironment
Source: PubMed Central journal article supplement (PMC11525956; doi:10.1158/2767-9764.crc-24-0263), 2024-10-31
Supplement: crc-24-0263_supplementary_table_s1_suppst1.pdf [file crc-24-0263_supplementary_table_s1_suppst1.pdf]

Supplementary Table 1 – Hyperparameters used for AUROC-optimized Machine Learning models. N/A = Not Applicable.

| BCLM Cluster      | ML Model Description from <i>caret</i>                      | R Library::R Function     | Hyperparameter | Description                   | Value    |
|-------------------|-------------------------------------------------------------|---------------------------|----------------|-------------------------------|----------|
| CD14+             | Least Squares Support Vector Machine with Polynomial Kernel | <i>kernlab::svmPoly()</i> | degree         | Polynomial Degree             | 1        |
|                   |                                                             |                           | scale          | Scale                         | 0.01     |
|                   |                                                             |                           | tau            | Regularization Parameter      | 128      |
| CD163+            | Neural Network                                              | <i>nnet::nnet()</i>       | size           | #Hidden Units                 | 15       |
|                   |                                                             |                           | decay          | Weight Decay                  | 0.00750  |
| CD163+MMP9+       | Bayesian Generalized Linear Model                           | <i>stats::glm()</i>       | N/A            | N/A                           | N/A      |
| CD206+            | Model Averaged Neural Network                               | <i>nnet::avNNet()</i>     | size           | #Hidden Units                 | 5        |
|                   |                                                             |                           | decay          | Weight Decay                  | 1e-04    |
|                   |                                                             |                           | bag            | Bagging                       | FALSE    |
| CD31+             | Least Squares Support Vector Machine with Polynomial Kernel | <i>kernlab::svmPoly()</i> | degree         | Polynomial Degree             | 3        |
|                   |                                                             |                           | scale          | Scale                         | 10       |
|                   |                                                             |                           | tau            | Regularization Parameter      | 32       |
| CD4+PD1+          | Boosted Generalized Linear Model                            | <i>mboost::glmboost()</i> | mstop          | # Boosting Iterations         | 500      |
|                   |                                                             |                           | prune          | AIC Prune                     | No       |
| CD56+             | Boosted Generalized Linear Model                            | <i>mboost::glmboost()</i> | mstop          | # Boosting Iterations         | 100      |
|                   |                                                             |                           | prune          | AIC Prune                     | No       |
| CD68+             | Neural Network                                              | <i>nnet::nnet()</i>       | size           | #Hidden Units                 | 3        |
|                   |                                                             |                           | decay          | Weight Decay                  | 0.000562 |
| CD68+CD163+CD206+ | Quantile Random Forest                                      | <i>randomForest::rf()</i> | mtry           | #Randomly Selected Predictors | 2        |
| CD68+MMP9+        | Boosted Generalized Linear Model                            | <i>mboost::glmboost()</i> | mstop          | # Boosting Iterations         | 500      |
|                   |                                                             |                           | prune          | AIC Prune                     | No       |
| CD8a+PD1+         | k-Nearest Neighbors                                         | <i>caret::knn()</i>       | kmax           | Max. #Neighbors               | 7        |
|                   |                                                             |                           | distance       | Distance                      | 7        |
|                   |                                                             |                           | kernel         | Kernel                        | 7        |

|                 |                                                             |                            |        |                               |       |
|-----------------|-------------------------------------------------------------|----------------------------|--------|-------------------------------|-------|
| CD8a+PD1-       | Neural Networks with Feature Extraction                     | <i>nnet::pcaNNet()</i>     | size   | #Hidden Units                 | 3     |
|                 |                                                             |                            | decay  | Weight Decay                  | 0.1   |
| Collagen+       | Boosted Generalized Linear Model                            | <i>mboost::glmboost()</i>  | mstop  | # Boosting Iterations         | 150   |
|                 |                                                             |                            | prune  | AIC Prune                     | No    |
| E-cad+          | Oblique Random Forest                                       | <i>obliqueRF::ORFsvm()</i> | mtry   | #Randomly Selected Predictors | 6     |
| HIF1 $\alpha$ + | Quantile Random Forest                                      | <i>randomForest::rf()</i>  | mtry   | #Randomly Selected Predictors | 3     |
| Ki-67+          | Bayesian Generalized Linear Model                           | <i>stats::glm()</i>        | N/A    | N/A                           | N/A   |
| MMP9+           | Boosted Generalized Linear Model                            | <i>mboost::glmboost()</i>  | mstop  | # Boosting Iterations         | 400   |
|                 |                                                             |                            | prune  | AIC Prune                     | No    |
| PD-L1+          | Model Averaged Neural Network                               | <i>nnet::avNNet()</i>      | size   | #Hidden Units                 | 1     |
|                 |                                                             |                            | decay  | Weight Decay                  | 1e-04 |
|                 |                                                             |                            | bag    | Bagging                       | False |
| pERK+           | Boosted Generalized Linear Model                            | <i>mboost::glmboost()</i>  | mstop  | # Boosting Iterations         | 300   |
|                 |                                                             |                            | prune  | AIC Prune                     | no    |
| $\alpha$ SMA+   | Least Squares Support Vector Machine with Polynomial Kernel | <i>kernlab::svmPoly()</i>  | degree | Polynomial Degree             | 2     |
|                 |                                                             |                            | scale  | Scale                         | 1000  |
|                 |                                                             |                            | tau    | Regularization Parameter      | 64    |
