# Supplementary material for: Characterization of the Breast Cancer Liver Metastasis Microenvironment via Machine Learning Analysis of the Primary Tumor Microenvironment
Source: PubMed Central journal article supplement (PMC11525956; doi:10.1158/2767-9764.crc-24-0263), 2024-10-31
Supplement: crc-24-0263_supplementary_table_s2_suppst2.pdf [file crc-24-0263_supplementary_table_s2_suppst2.pdf]

Supplementary Table 2 – Variable Importance for predicting BCLM CD14+ using primary tumor clusters. Larger values imply higher variable importance. Clusters used in the optimal model are marked with “X.”

| Cluster in Primary | Included In Optimal Model | Variable Importance |
|--------------------|---------------------------|---------------------|
| MMP9+              | X                         | 0.857               |
| E-cad+             | X                         | 0.804               |
| Ki-67+             | X                         | 0.768               |
| CD163+MMP9+        | X                         | 0.732               |
| CD68+              |                           | 0.696               |
| CD14+              |                           | 0.679               |
| PD-L1+             |                           | 0.679               |
| CD68+CD163+CD206+  |                           | 0.661               |
| CD56+              |                           | 0.643               |
| CD163+             |                           | 0.625               |
| CD8a+PD1-          |                           | 0.625               |
| CD4+PD1+           |                           | 0.607               |
| Collagen+          |                           | 0.607               |
| CD206+             |                           | 0.607               |
| pERK+              |                           | 0.607               |
| HIF1 $\alpha$ +    |                           | 0.571               |
| CD8a+PD1+          |                           | 0.554               |
| CD31+              |                           | 0.554               |
| CD68+MMP9+         |                           | 0.536               |
| $\alpha$ SMA+      |                           | 0.518               |
