# Supplementary material for: Characterization of the Breast Cancer Liver Metastasis Microenvironment via Machine Learning Analysis of the Primary Tumor Microenvironment
Source: PubMed Central journal article supplement (PMC11525956; doi:10.1158/2767-9764.crc-24-0263), 2024-10-31
Supplement: crc-24-0263_supplementary_table_s4_suppst4.pdf [file crc-24-0263_supplementary_table_s4_suppst4.pdf]

Supplementary Table 4 – Variable Importance for predicting BCLM CD163+MMP9+ using primary tumor clusters. Larger values imply higher variable importance. Clusters used in the optimal model are marked with “X.”

| Cluster in Primary | Included In Optimal Model | Variable Importance |
|--------------------|---------------------------|---------------------|
| CD206+             | X                         | 0.0000511           |
| CD4+PD1+           | X                         | 0.0000322           |
| CD68+              | X                         | 0.0000281           |
| CD163+             | X                         | 0.0000260           |
| MMP9+              |                           | 0.0000249           |
| CD163+MMP9+        |                           | 0.0000246           |
| CD8a+PD1+          |                           | 0.0000240           |
| PD-L1+             |                           | 0.0000237           |
| CD68+CD163+CD206+  |                           | 0.0000233           |
| CD68+MMP9+         |                           | 0.0000229           |
| CD56+              |                           | 0.0000188           |
| CD14+              |                           | 0.0000180           |
| CD8a+PD1-          |                           | 0.0000178           |
