# Supplementary material for: Characterization of the Breast Cancer Liver Metastasis Microenvironment via Machine Learning Analysis of the Primary Tumor Microenvironment
Source: PubMed Central journal article supplement (PMC11525956; doi:10.1158/2767-9764.crc-24-0263), 2024-10-31
Supplement: crc-24-0263_supplementary_table_s9_suppst9.pdf [file crc-24-0263_supplementary_table_s9_suppst9.pdf]

Supplementary Table 9 – Variable Importance for predicting BCLM CD68+ using primary tumor clusters. Larger values imply higher variable importance. Clusters used in the optimal model are marked with “X.”

| Cluster in Primary | Included In Optimal Model | Variable Importance |
|--------------------|---------------------------|---------------------|
| αSMA+              | X                         | 14.142              |
| HIF1α+             | X                         | 11.103              |
| E-cad+             | X                         | 9.592               |
| CD31+              | X                         | 8.898               |
| CD163+             | X                         | 7.808               |
| CD14+              | X                         | 7.049               |
| CD206+             | X                         | 6.721               |
| Collagen+          |                           | 5.287               |
| CD68+              |                           | 4.583               |
| CD56+              |                           | 4.334               |
| Ki-67+             |                           | 4.003               |
| CD8a+PD1+          |                           | 3.638               |
| CD163+MMP9+        |                           | 3.169               |
| CD68+CD163+CD206+  |                           | 1.972               |
| CD68+MMP9+         |                           | 1.825               |
| CD8a+PD1-          |                           | 1.552               |
| MMP9+              |                           | 1.505               |
| pERK+              |                           | 1.390               |
| PD-L1+             |                           | 1.163               |
| CD4+PD1+           |                           | 0.265               |
