# Supplementary material for: Characterization of the Breast Cancer Liver Metastasis Microenvironment via Machine Learning Analysis of the Primary Tumor Microenvironment
Source: PubMed Central journal article supplement (PMC11525956; doi:10.1158/2767-9764.crc-24-0263), 2024-10-31
Supplement: crc-24-0263_supplementary_table_s10_suppst10.pdf [file crc-24-0263_supplementary_table_s10_suppst10.pdf]

Supplementary Table 10 – Variable Importance for predicting BCLM CD68+CD163+CD206+ using primary tumor clusters. Larger values imply higher importance. Clusters used in the optimal model are marked with “X”.

| Cluster in Primary | Included In Optimal Model | Variable Importance |
|--------------------|---------------------------|---------------------|
| CD68+              | X                         | 1.226               |
| CD68+MMP9+         | X                         | 1.099               |
| CD56+              | X                         | 0.972               |
| pERK+              | X                         | 0.651               |
| $\alpha$ SMA+      | X                         | 0.449               |
| CD163+MMP9+        |                           | 0.350               |
| HIF1 $\alpha$ +    |                           | 0.228               |
| CD14+              |                           | 0.221               |
| CD8a+PD1-          |                           | 0.220               |
| CD68+CD163+CD206+  |                           | 0.199               |
| CD8a+PD1+          |                           | 0.198               |
| Ki-67+             |                           | 0.189               |
| MMP9+              |                           | 0.165               |
| CD206+             |                           | 0.157               |
| CD4+PD1+           |                           | 0.130               |
| Collagen+          |                           | 0.122               |
| E-cad+             |                           | 0.110               |
| PD-L1+             |                           | 0.102               |
| CD31+              |                           | 0.097               |
| CD163+             |                           | 0.089               |
