# Supplementary material for: Characterization of the Breast Cancer Liver Metastasis Microenvironment via Machine Learning Analysis of the Primary Tumor Microenvironment
Source: PubMed Central journal article supplement (PMC11525956; doi:10.1158/2767-9764.crc-24-0263), 2024-10-31
Supplement: crc-24-0263_supplementary_table_s17_suppst17.pdf [file crc-24-0263_supplementary_table_s17_suppst17.pdf]

Supplementary Table 17 – Variable Importance for predicting BCLM Ki-67+ using primary tumor clusters. Larger values imply higher variable importance. Clusters used in the optimal model are marked with “X.”

| Cluster in Primary | Included In Optimal Model | Variable Importance |
|--------------------|---------------------------|---------------------|
| CD206+             | X                         | 0.0001178           |
| CD4+PD1+           | X                         | 0.0001025           |
| MMP9+              | X                         | 0.0000995           |
| CD163+             | X                         | 0.0000988           |
| PD-L1+             | X                         | 0.0000978           |
| CD163+MMP9+        | X                         | 0.0000978           |
| CD68+              | X                         | 0.0000969           |
| CD14+              |                           | 0.0000952           |
| CD68+MMP9+         |                           | 0.0000949           |
| CD8a+PD1+          |                           | 0.0000933           |
| CD56+              |                           | 0.0000930           |
| CD68+CD163+CD206+  |                           | 0.0000904           |
| CD8a+PD1-          |                           | 0.0000878           |
